# Supplementary material for: Can assimilation of satellite observations improve subsurface biological properties in a numerical model? A case study for the Gulf of Mexico
Source: Copernicus journal article supplement (doi:10.5194/os-17-1141-2021), 2021-08-26
Supplement: Supplementary file 1 [file os-17-1141-2021-supplement.pdf]

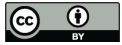

*Supplement of*

## **Can assimilation of satellite observations improve subsurface biological properties in a numerical model? A case study for the Gulf of Mexico**

**Bin Wang et al.**

*Correspondence to:* Bin Wang (bin.wang@dal.ca)

The copyright of individual parts of the supplement might differ from the article licence.

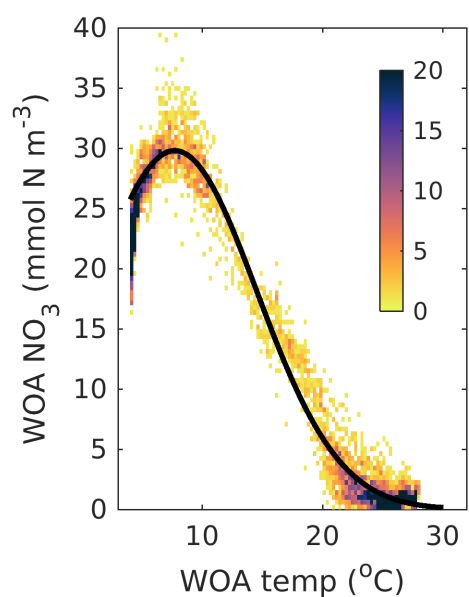

Figure S1. Empirical relations of temperature-NO<sub>3</sub> derived from World Ocean Atlas in the Gulf of Mexico. Colors indicate the number of observations within each bin.

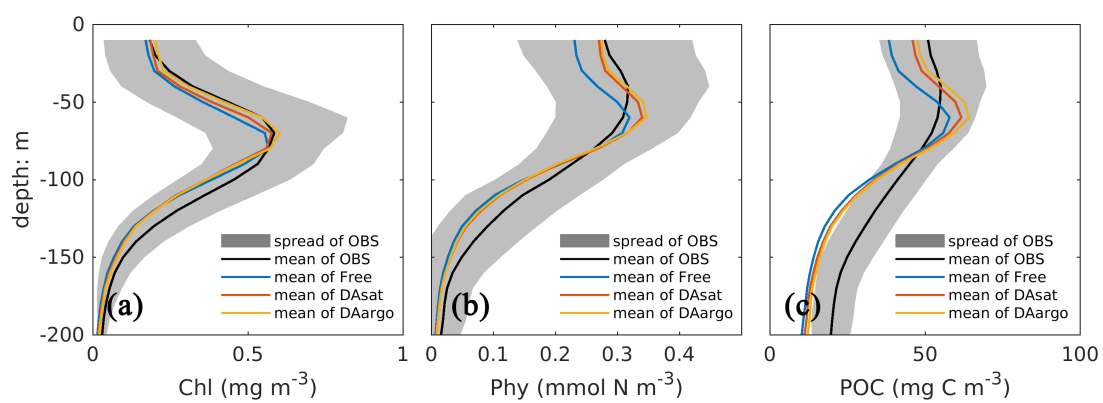

Figure S2. Vertical profiles of chlorophyll (a), phytoplankton (b), and POC (c) from BOEM floats and model experiments.

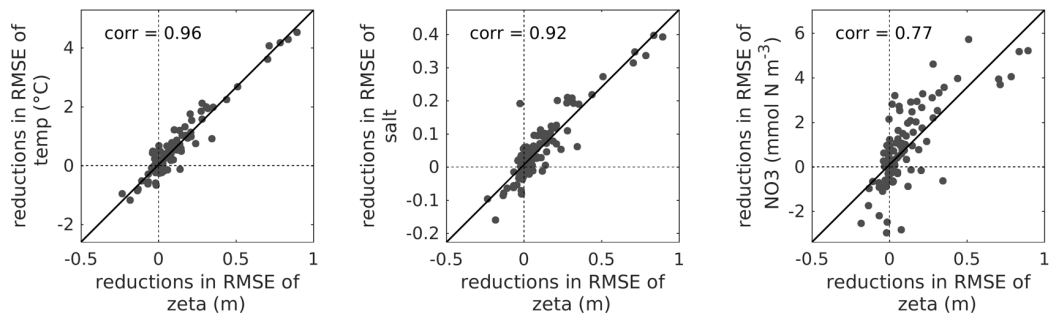

Figure S3. Correlations of improvement between zeta and temperature, salinity, and NO<sub>3</sub>

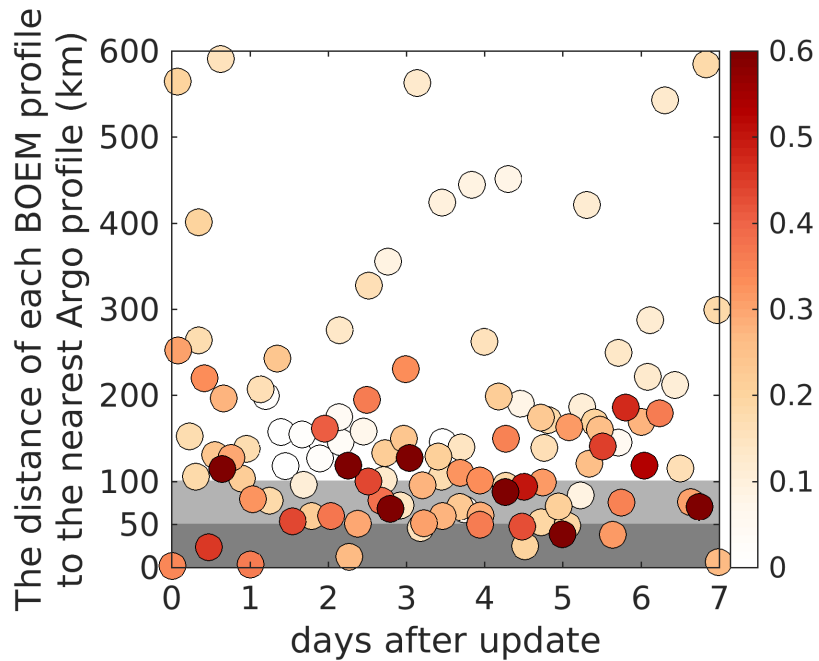

Figure S4 The root-mean-square-difference (RMSD) of temperature from each BOEM profile between two data assimilative runs, DASat and DAargo (indicated by the color). The x-axis represents days of each BOEM profile after each data assimilation cycle and the y-axis represents distance to the nearest Argo profile
